# Supplementary material for: Two blue iridium complexes for efficient electroluminescence with low efficiency roll-off
Source: Royal Society of Chemistry journal article supplement (doi:10.1039/c5ra14837e), 2015-01-01
Supplement: c5ra14837e1.pdf [file c5ra14837e1.pdf]

## Supporting Information

# Two blue iridium complexes for efficient electroluminescence with low efficiency roll-off

Qiu-Lei Xu, Xiao Liang, Liang Jiang, Yue Zhao, You-Xuan Zheng\*

*State Key Laboratory of Coordination Chemistry, Collaborative Innovation Center of Advanced Microstructures, Collaborative Innovation Center of Chemistry for Life Sciences, School of Chemistry and Chemical Engineering, Nanjing University, Nanjing 210093, P. R. China, e-mail: [yxzheng@nju.edu.cn](mailto:yxzheng@nju.edu.cn)*

|                                                                                                                                                                                              |   |
|----------------------------------------------------------------------------------------------------------------------------------------------------------------------------------------------|---|
| Supporting Information.....                                                                                                                                                                  | 1 |
| Table S1 Crystallographic data and structure refinement for complexes (dfppy) <sub>2</sub> Ir(tpip) and (dfppy) <sub>2</sub> Ir(Ftpip) .....                                                 | 2 |
| Table S2 The table of selected bond lengths of (dfppy) <sub>2</sub> Ir(tpip) and (dfppy) <sub>2</sub> Ir(Ftpip) .....                                                                        | 3 |
| Table S3. The orbital distributions of complexes (dfppy) <sub>2</sub> Ir(tpip) and (dfppy) <sub>2</sub> Ir(Ftpip).....                                                                       | 3 |
| Figure S1. The lifetime curves of (dfppy) <sub>2</sub> Ir(tpip) and (dfppy) <sub>2</sub> Ir(Ftpip) in degassed CH <sub>2</sub> Cl <sub>2</sub> solution at room temperature. ....            | 4 |
| Figure S2. The normalized emission spectra of (dfppy) <sub>2</sub> Ir(tpip) and (dfppy) <sub>2</sub> Ir(Ftpip) in CH <sub>2</sub> Cl <sub>2</sub> solution at room temperature and 77 K..... | 4 |
| Figure S3. The power efficiency–luminance ( $\eta_p$ -L) curves of device B1, B2 and B3. ....                                                                                                | 4 |

**Table S1** Crystallographic data and structure refinement for complexes (dfppy)<sub>2</sub>Ir(tpip) and (dfppy)<sub>2</sub>Ir(Ftpip)

|                                                                                                                       | (dfppy) <sub>2</sub> Ir(tpip)                  | (dfppy) <sub>2</sub> Ir(Ftpip)                 |
|-----------------------------------------------------------------------------------------------------------------------|------------------------------------------------|------------------------------------------------|
| <b>Formula</b>                                                                                                        | C <sub>44</sub> H <sub>30</sub> F <sub>4</sub> | C <sub>44</sub> H <sub>26</sub> F <sub>8</sub> |
|                                                                                                                       | IrN <sub>5</sub> O <sub>2</sub> P <sub>2</sub> | IrN <sub>5</sub> O <sub>2</sub> P <sub>2</sub> |
| <b>FW</b>                                                                                                             | 990.90                                         | 1062.84                                        |
| <b>T (K)</b>                                                                                                          | 296(2)                                         | 296(2)                                         |
| <b>Wavelength (Å)</b>                                                                                                 | 0.71073                                        | 0.71073                                        |
| <b>Crystal system</b>                                                                                                 | Monoclinic                                     | Monoclinic                                     |
| <b>Space group</b>                                                                                                    | <i>P</i> 2 <sub>1</sub> / <i>c</i>             | <i>P</i> 2 <sub>1</sub> / <i>n</i>             |
| <b><i>a</i> (Å)</b>                                                                                                   | 11.523 (3)                                     | 20.944(5)                                      |
| <b><i>b</i> (Å)</b>                                                                                                   | 16.473 (2)                                     | 19.770(5)                                      |
| <b><i>c</i> (Å)</b>                                                                                                   | 20.708 (3)                                     | 21.011(5)                                      |
| <b><i>α</i> (deg)</b>                                                                                                 | 90.00                                          | 90.00                                          |
| <b><i>β</i> (deg)</b>                                                                                                 | 90.00                                          | 106.420(4)                                     |
| <b><i>γ</i> (deg)</b>                                                                                                 | 90.00                                          | 90.00                                          |
| <b><i>V</i> (Å<sup>3</sup>)</b>                                                                                       | 3930.8(15)                                     | 8345(4)                                        |
| <b><i>Z</i></b>                                                                                                       | 4                                              | 8                                              |
| <b><i>ρ</i><sub>calcd</sub> (mg/cm<sup>3</sup>)</b>                                                                   | 1.674                                          | 1.692                                          |
| <b><i>μ</i> (Mo Kα) (mm<sup>-1</sup>)</b>                                                                             | 3.543                                          | 3.357                                          |
| <b><i>F</i> (000)</b>                                                                                                 | 1952                                           | 4160                                           |
| <b>Reflns collected</b>                                                                                               | 23539                                          | 71484                                          |
| <b>Unique</b>                                                                                                         | 7729                                           | 18321                                          |
| <b>Data/restraints/params</b>                                                                                         | 7729 / 0 / 523                                 | 18321 / 0 / 1117                               |
| <b>GOF on <i>F</i><sup>2</sup></b>                                                                                    | 0.892                                          | 0.991                                          |
| <b><i>R</i><sub>1</sub><sup><i>a</i></sup>, <i>wR</i><sub>2</sub><sup><i>b</i></sup> [<i>I</i> &gt; 2σ(<i>I</i>)]</b> | 0.0292, 0.0630                                 | 0.0357, 0.0885                                 |
| <b><i>R</i><sub>1</sub><sup><i>a</i></sup>, <i>wR</i><sub>2</sub><sup><i>b</i></sup> (all data)</b>                   | 0.0380, 0.0648                                 | 0.0628, 0.1007                                 |
| <b>CCDC NO</b>                                                                                                        | 1062396                                        | 1062397                                        |

$$R_1^a = \frac{\sum ||F_o| - |F_c||}{\sum |F_o|}, \quad wR_2^b = \left[ \frac{\sum w(F_o^2 - F_c^2)^2}{\sum w(F_o^2)} \right]^{1/2}$$

**Table S2** The table of selected bond lengths of (dfppy)<sub>2</sub>Ir(tpip) and (dfppy)<sub>2</sub>Ir(Ftpip)

| (dfppy) <sub>2</sub> Ir(tpip)  |          |             |          |            |          |
|--------------------------------|----------|-------------|----------|------------|----------|
| Selected bonds                 |          |             |          |            |          |
| Ir(1)-C(1)                     | 1.982(4) | Ir(1)-O(1)  | 2.202(2) | Ir(1)-N(4) | 2.048(3) |
| Ir(1)-C(11)                    | 1.970(3) | Ir(1)-O(2)  | 2.177(2) | Ir(1)-N(5) | 2.044(3) |
| O(2)-P(2)                      | 1.521(3) | N(1)-P(2)   | 1.591(3) | C(4)-N(2)  | 1.302(6) |
| O(1)-P(1)                      | 1.522(2) | N(1)-P(1)   | 1.590(3) | C(3)-N(2)  | 1.303(6) |
| C(3)-F(1)                      | 1.352(5) | C(4)-F(2)   | 1.355(5) |            |          |
| (dfppy) <sub>2</sub> Ir(Ftpip) |          |             |          |            |          |
| Selected bonds                 |          |             |          |            |          |
| Ir(2)-C(45)                    | 1.971(5) | Ir(2)-O(4)  | 2.180(3) | Ir(2)-N(8) | 2.034(4) |
| Ir(2)-C(55)                    | 1.965(5) | Ir(2)-O(3)  | 2.176(3) | Ir(2)-N(9) | 2.030(4) |
| O(3)-P(9)                      | 1.511(3) | N(10)-P(9)  | 1.587(4) | C(43)-N(6) | 1.288(8) |
| O(4)-P(11)                     | 1.504(3) | N(10)-P(11) | 1.579(4) | C(47)-N(6) | 1.290(8) |
| C(43)-F(13)                    | 1.352(7) | C(47)-F(14) | 1.355(7) |            |          |

**Table S3.** The orbital distributions of complexes (dfppy)<sub>2</sub>Ir(tpip) and (dfppy)<sub>2</sub>Ir(Ftpip).

| Group           |      | (dfppy) <sub>2</sub> Ir(tpip) | (dfppy) <sub>2</sub> Ir(Ftpip) |
|-----------------|------|-------------------------------|--------------------------------|
| Ir (%)          | LUMO | 5.02                          | 5.02                           |
|                 | HOMO | 56.22                         | 56.11                          |
| dfppy (%)       | LUMO | 91.53                         | 90.97                          |
|                 | HOMO | 37.36                         | 35.36                          |
| tpip /Ftpip (%) | LUMO | 3.45                          | 4.01                           |
|                 | HOMO | 6.41                          | 8.52                           |

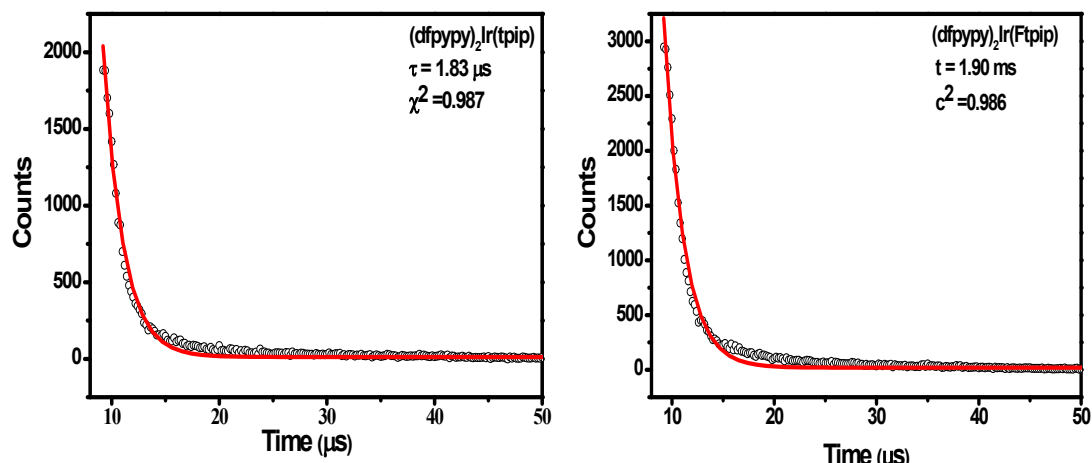

**Figure S1.** The lifetime curves of  $(dfppy)_2Ir(tpip)$  and  $(dfppy)_2Ir(Ftpip)$  in degassed  $CH_2Cl_2$  solution at room temperature.

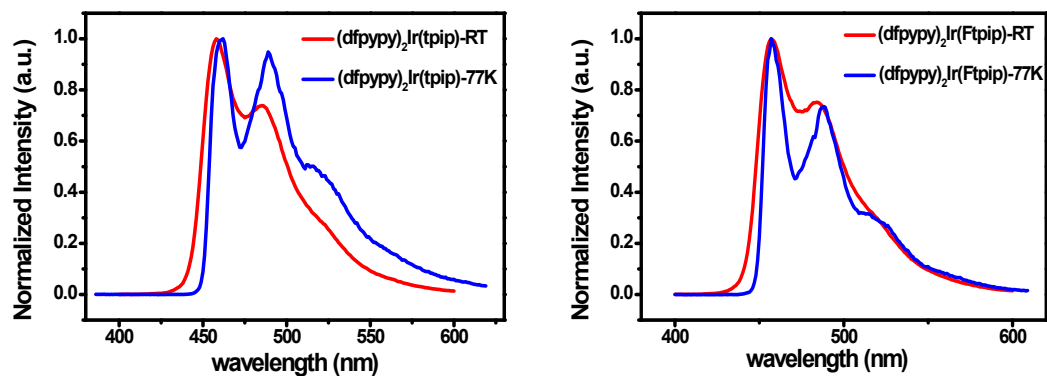

**Figure S2.** The normalized emission spectra of  $(dfppy)_2Ir(tpip)$  and  $(dfppy)_2Ir(Ftpip)$  in  $CH_2Cl_2$  solution at room temperature and 77 K.

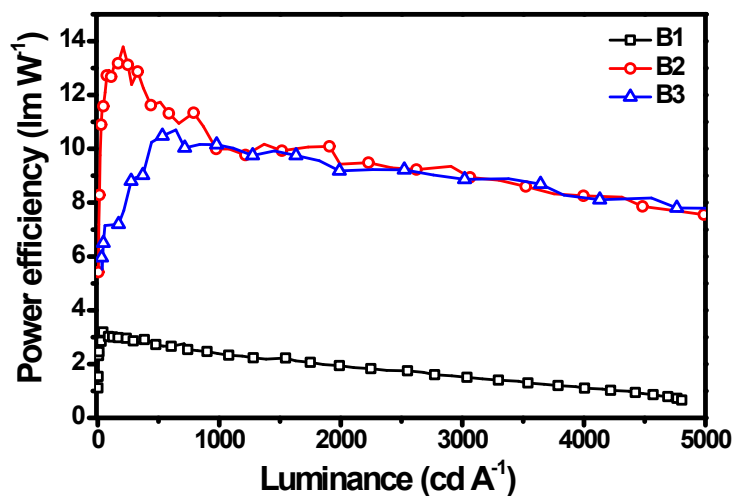

**Figure S3.** The power efficiency–luminance ( $\eta_p$ – $L$ ) curves of device **B1**, **B2** and **B3**.
